# Supplementary material for: Was erwarten Mitarbeiter der Notfallmedizin vom Telenotarzt?
Source: Springer Nature journal article supplement (doi:10.1007/s10049-018-0520-x), 2018-09-11
Supplement: MOESM2 [file 16115876]

**Einfluss des Telenotarztes auf Kennzeiten im Vergleich der Berufsgruppen**

| **Frage** | **Berufsgruppe** | **Trifft nicht zu** | **Trifft eher nicht zu** | **Trifft eher zu** | **Trifft zu** |
| --- | --- | --- | --- | --- | --- |
| Ich denke, dass das Konzept des Telenotarztes zu einer  **schnelleren Diagnosefindung** führt. | **Gesamt** | **10% (19)** | **28% (54)** | **42% (80)** | **20% (39)** |
| Disponent | 0% (0) | 20% (4) | 35% (7) | 45% (9) |
| Nichtärztliches Rettungsdienstpersonal | 8% (7) | 22% (20) | 44% (39) | 26% (23) |
| Notarzt | 13% (6) | 35% (16) | 41% (19) | 11% (5) |
| Pflege in der Notaufnahme | 12% (3) | 38% (10) | 46% (12) | 4% (1) |
| Arzt in der Notaufnahme | 27% (3) | 36% (4) | 27% (3) | 9% (1) |
| Ich denke, dass das Konzept des Telenotarztes zu einem  **schnelleren Therapiebeginn** führt. | **Gesamt** | **5% (10)** | **22% (42)** | **46% (89)** | **26% (51)** |
| Disponent | 0% (0) | 5% (1) | 52% (11) | 43% (9) |
| Nichtärztliches Rettungsdienstpersonal | 4% (4) | 25% (22) | 36% (32) | 35% (31) |
| Notarzt | 4% (2) | 22% (10) | 60% (27) | 13% (6) |
| Pflege in der Notaufnahme | 8% (2) | 23% (6) | 54% (14) | 15% (4) |
| Arzt in der Notaufnahme | 19% (2) | 27% (3) | 45% (5) | 9% (1) |
| Ich denke, dass das Konzept des Telenotarztes zu einer  **schnelleren Transportfähigkeit** führt. | **Gesamt** | **11% (22)** | **30% (57)** | **39% (75)** | **20% (38)** |
| Disponent | 5% (1) | 19% (4) | 48% (10) | 28% (6) |
| Nichtärztliches Rettungsdienstpersonal | 12% (11) | 31% (28) | 30% (27) | 26% (23) |
| Notarzt | 13% (6) | 36% (16) | 38% (17) | 13% (6) |
| Pflege in der Notaufnahme | 8% (2) | 19% (5) | 65% (17) | 8% (2) |
| Arzt in der Notaufnahme | 18% (2) | 36% (4) | 36% (4) | 9% (1) |
