# Supplementary material for: Was erwarten Mitarbeiter der Notfallmedizin vom Telenotarzt?
Source: Springer Nature journal article supplement (doi:10.1007/s10049-018-0520-x), 2018-09-11
Supplement: MOESM3 [file 16115876]

**Einfluss des Telenotarztes auf die Patientenversorgung und Arbeit**

| **Frage** | **Berufsgruppe** | **Trifft nicht zu** | **Trifft eher nicht zu** | **Trifft eher zu** | **Trifft zu** |
| --- | --- | --- | --- | --- | --- |
| Ich denke, dass das Konzept des Telenotarztes die **Qualität der**  **Patientenversorgung verbessert**. | **Gesamt** | **4% (8)** | **23% (44)** | **56% (105)** | **17% (32)** |
| Disponent | 0% (0) | 10% (2) | 62% (13) | 28% (6) |
| Nichtärztliches Rettungsdienstpersonal | 3% (3) | 20% (17) | 53% (45) | 23% (20) |
| Notarzt | 2% (1) | 33% (15) | 52% (24) | 13% (6) |
| Pflege in der Notaufnahme | 4% (1) | 35% (9) | 61% (16) | 0% (0) |
| Arzt in der Notaufnahme | 27% (3) | 9% (1) | 64% (7) | 0% (0) |
| Ich denke, dass das Konzept des Telenotarztes meine **berufliche**  **Leistung verbessert**. | **Gesamt** | **20% (39)** | **47% (90)** | **19% (37)** | **13% (25)** |
| Disponent | 19% (4) | 52% (11) | 19% (4) | 10% (2) |
| Nichtärztliches Rettungsdienstpersonal | 10% (9) | 44% (39) | 23% (20) | 23% (20) |
| Notarzt | 36% (16) | 40% (18) | 18% (8) | 6% (3) |
| Pflege in der Notaufnahme | 23% (6) | 62% (16) | 15% (4) | 0% (0) |
| Arzt in der Notaufnahme | 36% (4) | 55% (6) | 9% (1) | 0% (0) |
| Ich denke, dass das Konzept des Telenotarztes meine  **Arbeitsbelastung vermindert**. | **Gesamt** | **32% (61)** | **47% (91)** | **14% (27)** | **7% (14)** |
| Disponent | 43% (9) | 43% (9) | 9% (2) | 5% (1) |
| Nichtärztliches Rettungsdienstpersonal | 33% (29) | 40% (36) | 17% (15) | 10% (9) |
| Notarzt | 30% (14) | 50% (23) | 15% (7) | 4% (2) |
| Pflege in der Notaufnahme | 19% (5) | 69% (18) | 12% (3) | 0% (0) |
| Arzt in der Notaufnahme | 36% (4) | 45% (5) | 0% (0) | 18% (2) |
| Ich denke, dass das Konzept des Telenotarztes meinen  **Dokumentationsaufwand vermindert.** | **Gesamt** | **37% (72)** | **46% (90)** | **10% (19)** | **6% (12)** |
| Disponent | 47% (10) | 43% (9) | 5% (1) | 5% (1) |
| Nichtärztliches Rettungsdienstpersonal | 38% (34) | 40% (36) | 12% (11) | 9% (8) |
| Notarzt | 37% (17) | 52% (24) | 7% (3) | 4% (2) |
| Pflege in der Notaufnahme | 23% (6) | 65% (17) | 12% (3) | 0% (0) |
| Arzt in der Notaufnahme | 45% (5) | 36% (4) | 9% (1) | 9% (1) |
