# Supplementary figures and images for: Was erwarten Mitarbeiter der Notfallmedizin vom Telenotarzt?
Source: Springer Nature journal article supplement (doi:10.1007/s10049-018-0520-x), 2018-09-11

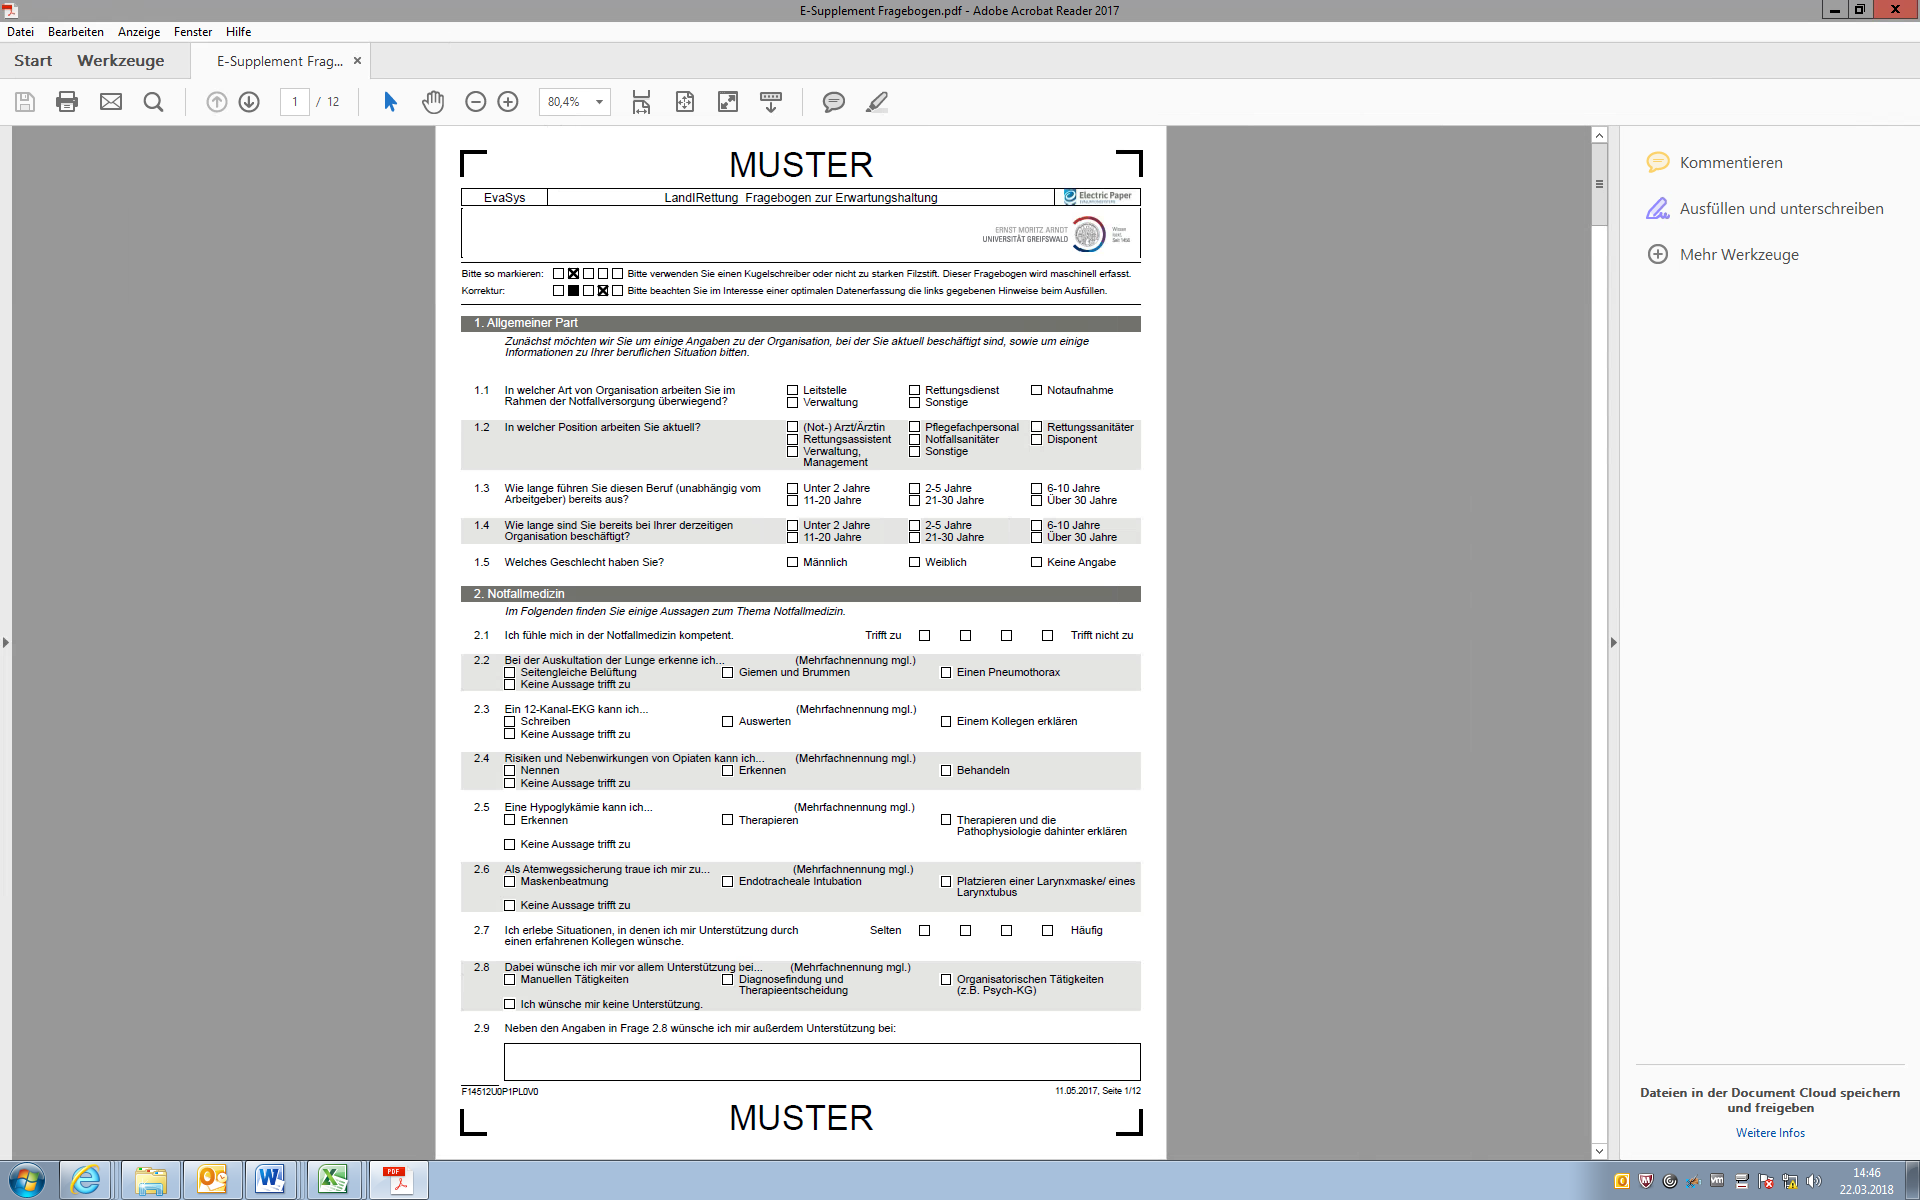


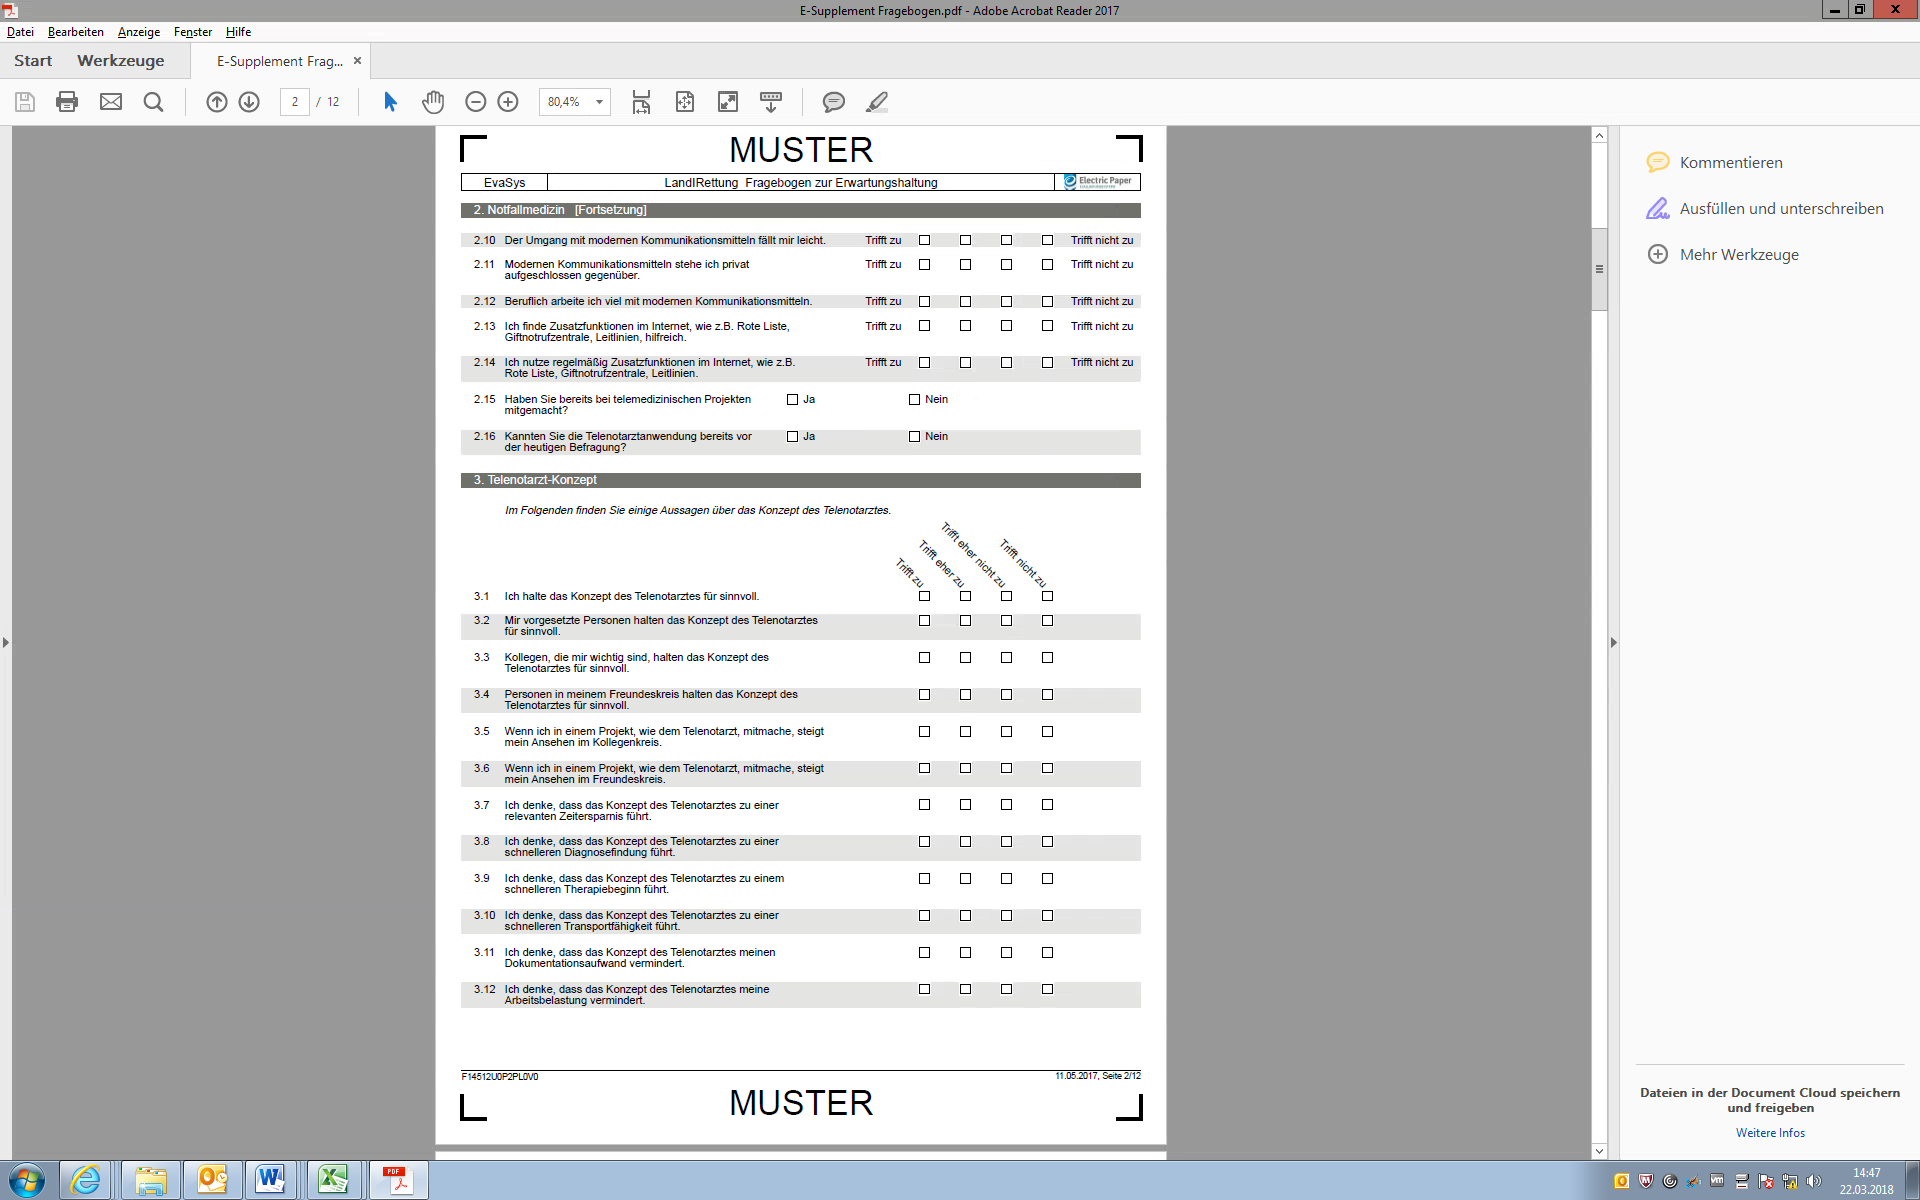


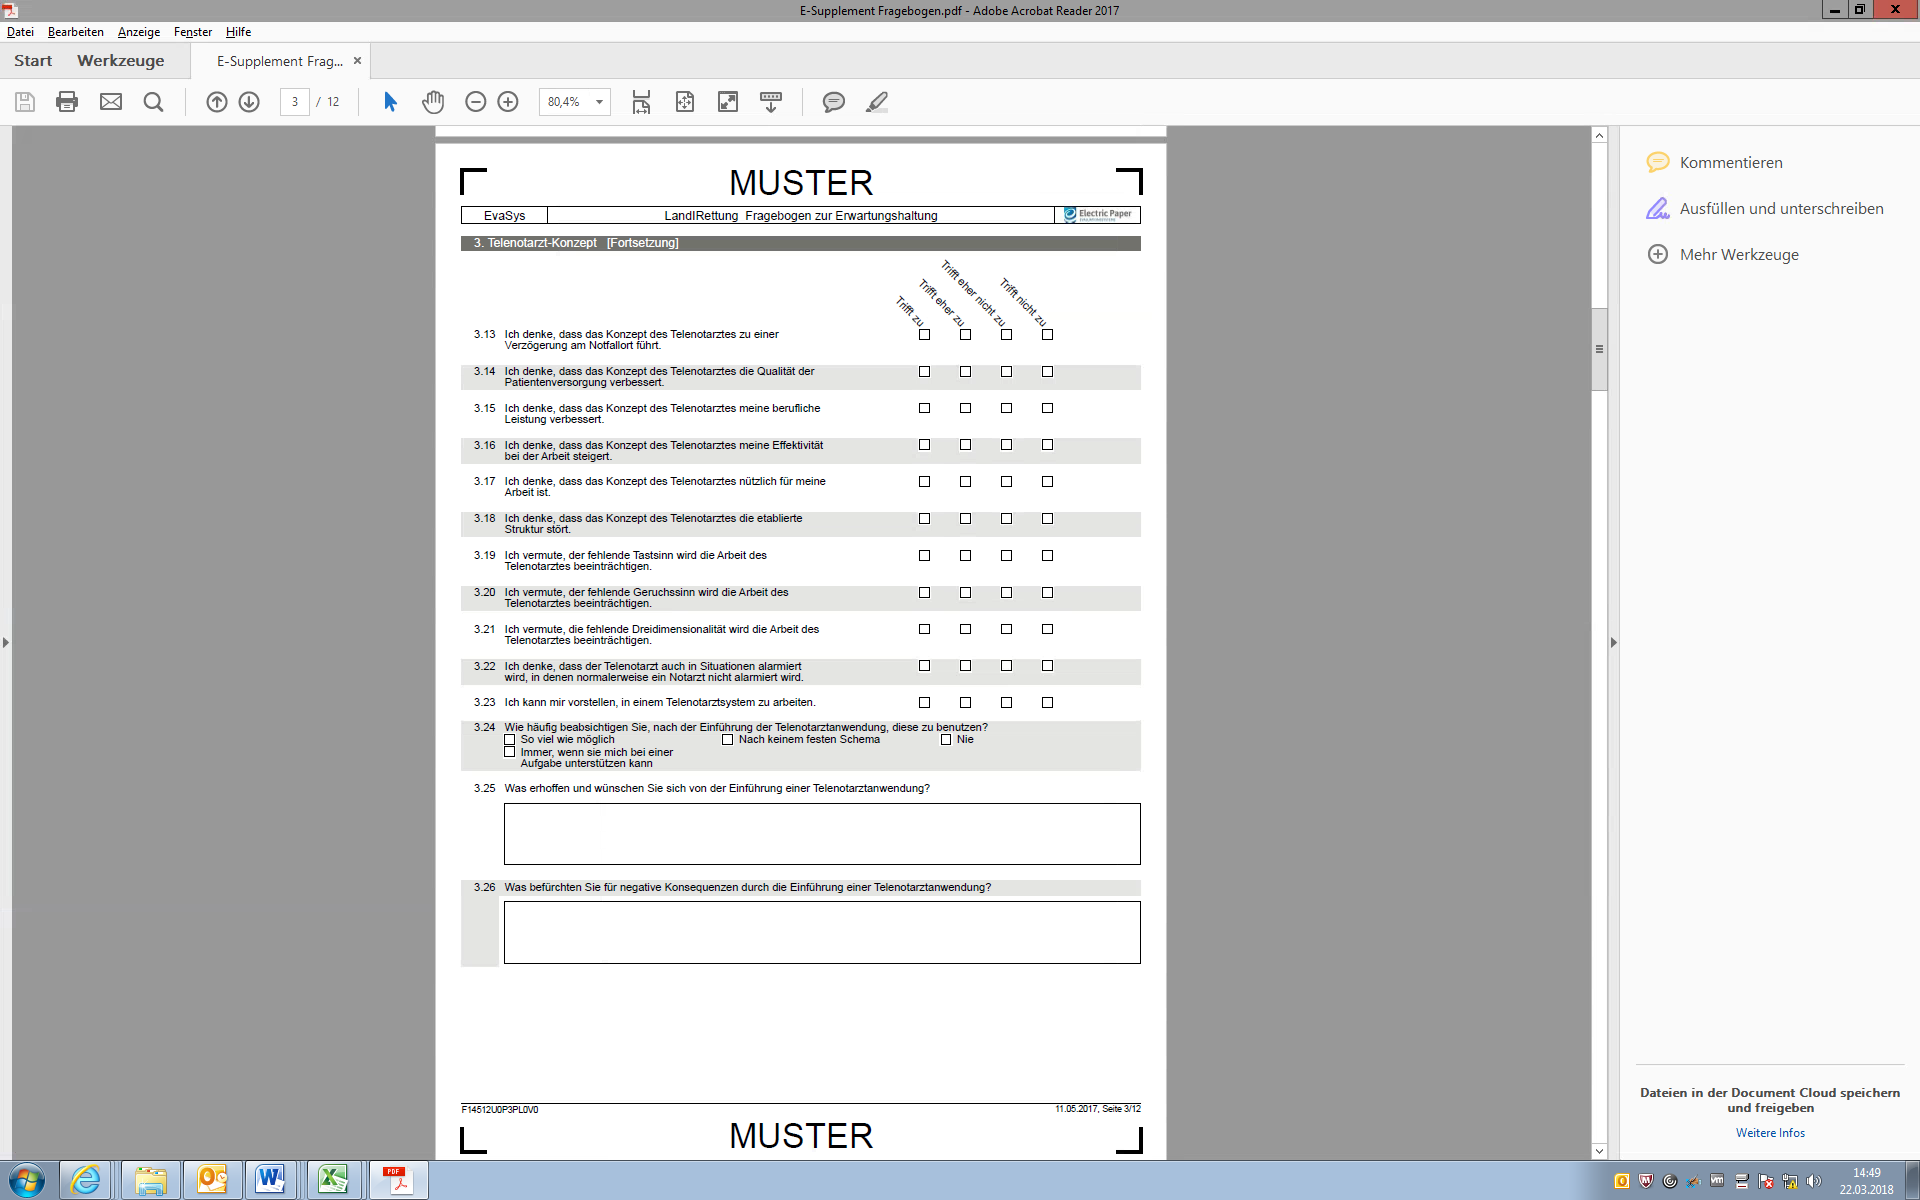

Supplement: MOESM1 [file 16115876]
